# Supplementary material
Source: MDPI journal article supplement (https://www.mdpi.com/2075-163X/8/3/98)
Supplement: s1 [file s1]

## Supplementary Materials: Biosynthesis of schwertmannite and goethite in a bioreactor with acidophilic Fe(II)-oxidizing betaproteobacterium strain GJ-E10

Naoyuki Miyata <sup>1,\*</sup>, Ayato Takahashi <sup>1</sup>, Tatsuo Fujii <sup>2</sup>, Hideki Hashimoto <sup>3</sup> and Jun Takada <sup>2,4</sup>

**Table S1.** Kinetics of biotic and abiotic Fe(II) oxidation at different temperatures and pH levels.

| Conditions           | Eq. 2 Parameters ( $\pm$ SD)     |        | Eq. 1 Parameters ( $\pm$ SD)     |                                  |        |
|----------------------|----------------------------------|--------|----------------------------------|----------------------------------|--------|
|                      | $k$ ( $\text{h}^{-1}$ )          | $R^2$  | $X_0$ (mM) <sup>b</sup>          | $\mu_{max}$ ( $\text{h}^{-1}$ )  | $R^2$  |
| 25°C /GJ-E10 /pH 2.2 | - <sup>a</sup>                   | -      | $1.35 \times 10^{-1}$            | $(8.82 \pm 0.06) \times 10^{-2}$ | 0.9891 |
| pH 2.5               | -                                | -      | $1.35 \times 10^{-1}$            | $(1.02 \pm 0.01) \times 10^{-1}$ | 0.9907 |
| pH 3.0               | -                                | -      | $(1.35 \pm 0.51) \times 10^{-1}$ | $(1.05 \pm 0.08) \times 10^{-1}$ | 0.9900 |
| pH 3.5               | -                                | -      | $1.35 \times 10^{-1}$            | $(1.01 \pm 0.01) \times 10^{-1}$ | 0.9842 |
| pH 3.8               | -                                | -      | $1.35 \times 10^{-1}$            | $(9.16 \pm 0.05) \times 10^{-2}$ | 0.9907 |
| pH 4.2               | -                                | -      | -                                | -                                | -      |
| 25°C/abiotic/ pH 3.0 | NO <sup>c</sup>                  | NO     | -                                | -                                | -      |
| pH 3.5               | $(4.81 \pm 0.73) \times 10^{-4}$ | 0.6465 | -                                | -                                | -      |
| pH 3.8               | $(7.96 \pm 1.18) \times 10^{-4}$ | 0.7716 | -                                | -                                | -      |
| pH 4.2               | $(2.41 \pm 0.11) \times 10^{-3}$ | 0.9415 | -                                | -                                | -      |
| 37°C/GJ-E10/pH 2.5   | -                                | -      | $3.84 \times 10^{-1}$            | $(1.71 \pm 0.03) \times 10^{-1}$ | 0.9430 |
| pH 3.0               | -                                | -      | $(3.84 \pm 1.30) \times 10^{-1}$ | $(1.88 \pm 0.16) \times 10^{-1}$ | 0.9937 |
| pH 3.5               | -                                | -      | $3.84 \times 10^{-1}$            | $(1.61 \pm 0.01) \times 10^{-1}$ | 0.9951 |
| 37°C/abiotic/pH 2.5  | NO                               | NO     | -                                | -                                | -      |
| pH 3.0               | $(1.22 \pm 0.17) \times 10^{-3}$ | 0.5643 | -                                | -                                | -      |
| pH 3.5               | $(1.57 \pm 0.08) \times 10^{-3}$ | 0.9620 | -                                | -                                | -      |

<sup>a</sup> Not applicable. <sup>b</sup>  $X_0$  that was determined for the cultures at pH 3.0 served as a fixed value in analysis at other pH levels. <sup>c</sup> Fe(II) oxidation was not observed under these conditions.

**Table S2.** A comparison of biotic and abiotic oxidation of Fe(II) under different pH and temperature conditions.

| Conditions   | Term (h) Calculated <sup>a</sup> |                   | Ratio <sup>c</sup> |
|--------------|----------------------------------|-------------------|--------------------|
|              | Biotic Oxidation                 | Abiotic Oxidation |                    |
| 25°C, pH 2.5 | 51                               | - <sup>b</sup>    | -                  |
| 25°C, pH 3.0 | 49                               | -                 | -                  |
| 25°C, pH 3.5 | 52                               | 4800              | 1/92               |
| 25°C, pH 3.8 | 57                               | 2900              | 1/51               |
| 25°C, pH 4.2 | -                                | 960               | -                  |
| 37°C, pH 2.5 | 24                               | -                 | -                  |
| 37°C, pH 3.0 | 22                               | 1900              | 1/86               |
| 37°C, pH 3.5 | 26                               | 1500              | 1/58               |

<sup>a</sup>Incubation time needed for oxidation of 90% of the Fe(II) amount initially added (i.e.  $S/S_0 = 0.1$ ). The calculations for biotic and abiotic Fe(II) oxidation were conducted via Eqs. 1 and 2, respectively, with parameters shown in Table S1. <sup>b</sup>Not calculated. <sup>c</sup>Biotic versus abiotic oxidation.

**Table S3.** Sorption capacity values of metal oxyanions in schwertmannite and goethite phases formed in cultures of strain GJ-E10<sup>a</sup>.

| Metal   | Schwertmannite                                             |                           |        | Goethite                                                   |                           |        |
|---------|------------------------------------------------------------|---------------------------|--------|------------------------------------------------------------|---------------------------|--------|
|         | Maximum sorption<br>( $\Gamma_{max}$ ), mg g <sup>-1</sup> | $K$ (L mg <sup>-1</sup> ) | $R^2$  | Maximum sorption<br>( $\Gamma_{max}$ ), mg g <sup>-1</sup> | $K$ (L mg <sup>-1</sup> ) | $R^2$  |
| As(V)   | 123 ± 5                                                    | 3.9 ± 0.8                 | 0.9554 | 51.0 ± 3.1                                                 | 2.6 ± 1.0                 | 0.8209 |
| As(III) | 70.1 ± 5.9                                                 | 0.087 ± 0.022             | 0.9409 | 81.2 ± 12.2                                                | 0.041 ± 0.014             | 0.9272 |
| Cr(VI)  | 20.1 ± 1.1                                                 | 0.32 ± 0.06               | 0.9663 | 15.8 ± 0.9                                                 | 2.3 ± 0.7                 | 0.9208 |
| Se(VI)  | 53.2 ± 5.4                                                 | 0.052 ± 0.011             | 0.9739 | 26.2 ± 1.7                                                 | 0.073 ± 0.014             | 0.9738 |

<sup>a</sup>The data on sorption isotherms were fitted to the Langmuir equation to estimate sorption capacity:

$\Gamma = \Gamma_{max} \cdot \frac{K \cdot [Metal]}{1 + K \cdot [Metal]}$ , where  $\Gamma$  is the amount of metal adsorbed on the solid,  $\Gamma_{max}$  is the maximum metal sorption,  $K$  is the Langmuir constant, and  $[Metal]$  is the metal concentration in the aqueous phase.

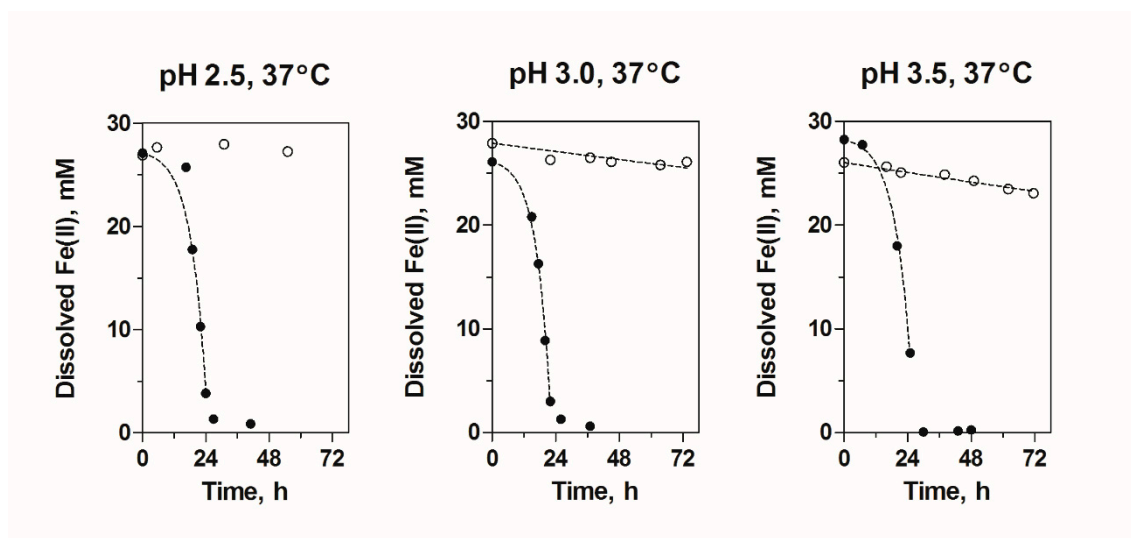

**Figure S1.** Fe(II) oxidation kinetics in cultures of strain GJ-E10 (filled circles) and in an abiotic medium (open circles) at different pH levels at 37°C. The dashed lines show nonlinear regression of the data from biotic cultures and the abiotic medium to Equations (1) and (2), respectively.

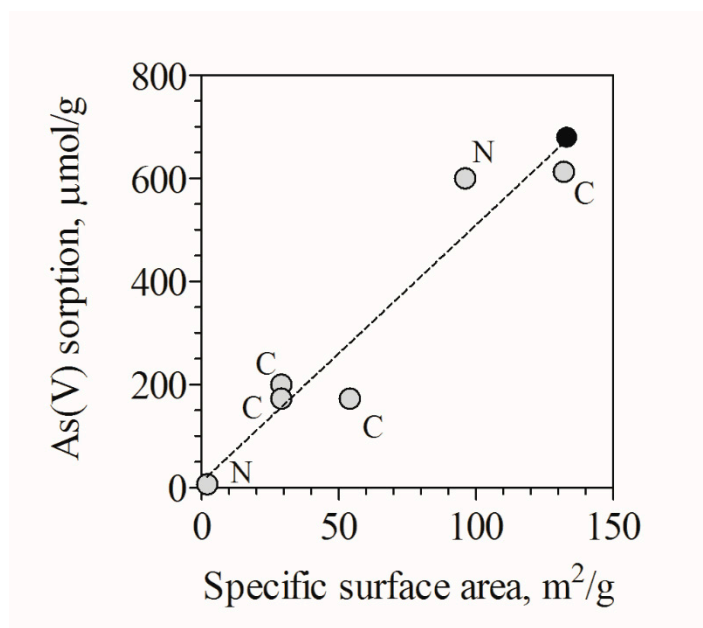

**Figure S2.** The relation between As(V) sorption capacity and specific surface area in goethite phases. The plotted data (grey circles) are from Asta et al. [39]; naturally occurring and chemically synthesized phases are indicated by 'N' and 'C', respectively. The black circle represents the value for goethite produced by strain GJ-E10. The dashed line shows linear regression of the data with a slope of 5.1 ( $\mu\text{mol m}^{-2}$ ;  $r > 0.966$ ).

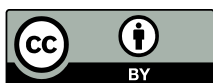

© 2018 by the authors. Submitted for possible open access publication under the terms and conditions of the Creative Commons Attribution (CC BY) license (<http://creativecommons.org/licenses/by/4.0/>).
